# Supplementary material for: In Vitro Modeling of Human Germ Cell Development Using Pluripotent Stem Cells
Source: PubMed Central journal article supplement — Stem Cell Reports. 2018 Feb 1;10(2):509–23. doi: 10.1016/j.stemcr.2018.01.001 (PMC5830957; doi:10.1016/j.stemcr.2018.01.001), 2018-02-01
Supplement: mmc1.pdf [file mmc1.pdf]

**Stem Cell Reports, Volume 10**

**Supplemental Information**

***In Vitro* Modeling of Human Germ Cell Development Using Pluripotent  
Stem Cells**

**Yuncheng Zhao, Shicheng Ye, Dongli Liang, Pengxiang Wang, Jing Fu, Qing Ma, Ruijiao Kong, Linghong Shi, Xueping Gong, Wei Chen, Wubin Ding, Wenjing Yang, Zijue Zhu, Huixing Chen, Xiaoxi Sun, Jun Zhu, Zheng Li, and Yuan Wang**

## **Supplemental Experimental Procedures**

### ***Crystal violet staining and MTT assay***

Cells were fixed by 4% paraformaldehyde (PFA) and then incubated with 0.05% crystal violet buffer (Sigma-Aldrich) for 30 min before photograph. For MTT assay, cells were incubated with 0.5 mg/mL MTT solution (Sigma-Aldrich) at 37 °C for 2 h, washed with DMSO, and then measured for absorbance intensity at 490 nm and 650 nm.

### ***Karyotyping***

Karyotyping of the hESC and iPSC lines was carried out every 10 passages. Each cell line was analyzed by standard G-banding techniques and interpreted with the International System for Human Cytogenetic Nomenclature.

### ***Western Blots***

Western blots were performed according to standard protocols (Zhang et al., 2016) and the final fluorescent signals against targeted proteins were detected using the Li-COR Odyssey system (LI-COR Biosciences, Lincoln, NE). Primary antibodies were used: PLZF (R&D, MAB2944), Tubulin (Santa Cruz, sc-69966), MVH (Abcam, ab27591), DAZL (Abcam, ab34139),  $\beta$ -actin (Cell Signaling Technology, CST#3700).

### ***Molecular diagnosis of Y-chromosomal microdeletions***

The molecular diagnosis of Y-chromosomal was performed following the protocols by European Academy of Andrology and the European Molecular Genetics Quality Network (Simoni et al., 1999; Simoni et al., 2004). Primers are listed in Supplemental Table S5.

### ***RNA sequencing and analyses***

Biological duplicates were prepared from human PSCs and differentiated cells on day 12 (mixed population with more than 80% PLZF+ cells), differentiated population with enforced PLZF expression, and CD90+ cells isolated from human testes. *In vitro* derived haploid cells (pooled from two independent experiments) and spermatids pooled from testes of two OA patients were harnessed by flow cytometry through Hoechst 33342 staining. RNA-seq library was constructed using NuGen Ovation Ultralow System (NuGen) following the manufacture's instruction. The Resulting libraries were size selected by agarose gel electrophoresis, and subsequently sequenced using the Illumina HiSeq-2500 platform with a 2x50 bp modality. Raw sequencing reads mapped to the human reference genome hg19 using TopHat2 (Kim et al., 2013). FPKM (fragments per kilobase per million mapped reads) was computed using HTseq (Anders et al., 2015). Genes for RNA-seq analyses were obtained from <http://www.ebi.ac.uk/QuickGO/>. Genes/transcripts for germ cell related factors include: GO\_0001541, GO\_0007276, GO\_0007281, GO\_0007283, GO\_0007286, GO\_0007310, GO\_0007530, GO\_0007548, GO\_0008354, GO\_0008406, GO\_0008584, GO\_0009566, GO\_0019953, GO\_0036099, GO\_0042078, GO\_0046661, GO\_0048232, GO\_0048477, GO\_0048515, GO\_0072520; Databases for genes/transcripts in stem cell functions include: GO0019827, GO\_0072089, GO\_0048867, GO\_0048866, GO\_0048865, GO\_0048864, GO\_0048863, GO\_0030718, GO\_0017145; Genes/transcripts in three germ layers: GO\_0007398, GO\_0007492, GO\_0007498.

### **References cited in Supplemental Information**

Anders, S., Pyl, P.T., and Huber, W. (2015). HTSeq--a Python framework to work with high-throughput sequencing data. *Bioinformatics* 31, 166-169.

Easley, C.A.t., Phillips, B.T., McGuire, M.M., Barringer, J.M., Valli, H., Hermann, B.P., Simerly, C.R., Rajkovic, A., Miki, T., Orwig, K.E., *et al.* (2012). Direct differentiation of human pluripotent stem cells into haploid spermatogenic cells. *Cell reports* 2, 440-446.

Kim, D., Pertea, G., Trapnell, C., Pimentel, H., Kelley, R., and Salzberg, S.L. (2013). TopHat2: accurate alignment of transcriptomes in the presence of insertions, deletions and gene fusions. *Genome biology* 14, R36.

Simoni, M., Bakker, E., Eurlings, M.C., Matthijs, G., Moro, E., Muller, C.R., and Vogt, P.H. (1999). Laboratory guidelines for molecular diagnosis of Y-chromosomal microdeletions. *Int J Androl* 22, 292-299.

Simoni, M., Bakker, E., and Krausz, C. (2004). EAA/EMQN best practice guidelines for molecular diagnosis of y-chromosomal microdeletions. State of the art 2004. *Int J Androl* 27, 240-249.

Zhang, J., Wang, Q., Wang, M., Jiang, M., Wang, Y., Sun, Y., Wang, J., Xie, T., Tang, C., Tang, N., *et al.* (2016). GASZ and mitofusin-mediated mitochondrial functions are crucial for spermatogenesis. *EMBO reports* 17, 220-234.

Zhang, X., Li, B., Li, W., Ma, L., Zheng, D., Li, L., Yang, W., Chu, M., Chen, W., Mailman, R.B., *et al.* (2014). Transcriptional repression by the BRG1-SWI/SNF complex affects the pluripotency of human embryonic stem cells. *Stem cell reports* 3, 460-474.

## Supplemental Figure Legends

**Figure S1. Derivation of SLCs and haploid cells.** (A) Apoptosis analyses using FITC-annexin V and propidium iodine were performed on different PSC lines at day 5 post differentiation using Easley's protocol (Easley *et al.*, 2012) and the optimized method in this study. (B) Fold changes of percentage of PLZF<sup>+</sup> cells in the presence or absence of vitamin C (Vc) during differentiation of H1 ESCs, measured by flow cytometry. A representative image of PLZF protein expression detected by Western Blots. (C) Flow cytometry of PLZF<sup>+</sup> cells with different treatment of vitamin C and 2–mecaptoethanol (2ME) combination. (D) Percentage of PLZF<sup>+</sup> cells (upper panel) and haploid population (lower panel) determined *via* flow cytometry using various concentration of xeno-free serum replacement in differentiation medium. (E) Western Blots were performed on H1 parental ESCs and the differentiated population on day 15 post ESC induction.

**Figure S2. Characterization of SLCs and haploid cells.** (A) FISH analyses on sex chromosomes

(right panel) and Chr 7 left panel) of H1 ESCs, sorted haploid cells derived from H1 ESCs, and diploid cells collected from the same batch of differentiation culture. Scale bar: 5  $\mu$ m. (B) Sorting efficiency of PLZF<sup>+</sup> SLCs from H1 ESCs used in imprinting analyses by flow cytometry.

**Figure S3. Genome-wide transcription profiling of SLCs and haploid cells.** (A) Sorting efficiency of CD90<sup>+</sup> SSCs from biopsied testis samples used in RNA-seq by flow cytometry. (B) Genes analyzed in Figure 2B-C. We included 761 genes that were related to germ cell development from online database and as well displayed low expression in undifferentiated PSCs. In addition, we included 926 transcripts that were highly expressed in CD90<sup>+</sup> cells and 350 transcripts that were associated with PSCs, thus totally the levels of 1,815 transcripts were analyzed on *in vitro* derived SLCs and *in vivo* CD90<sup>+</sup> spermatogonia in Figure 2B. (C) Heat-map on 33 genes that were involved in germ cell development and genes that were expressed in stem cells were analyzed on PSCs, SLCs, and CD90<sup>+</sup> cells collected from biopsied samples. (D) Real-time RT-PCR on transcript levels of genes that participated in germ cell development at various time points along H1 hESC differentiation. (E) Real-time RT-PCR assays on H1 hESCs, induced population at day 12 post hESC differentiation, and CD90<sup>+</sup> cells isolated from biopsied human testes. (D-E) Data are shown as mean  $\pm$  one s.e.m. from three independent experiments. (F) Percentage of transcripts upregulated in genes related to three germ layer specification. (G) Heat-map of RNA-seq on 98 transcripts (from 61 genes) in meiosis were analyzed on PSCs, *in vitro*-derived haploid cells pooled from two experiments, and pooled spermatids collected from two OA patients. Cluster analysis displayed that *in vitro* derived haploid cells closely resembled *in vivo* developed spermatids.

**Figure S4. Targeting human NANOS3 gene.** (A) The start position of *NANOS3* deletion from

three PSC clones was labelled (with red arrow at the end of yellow highlighted sequences) in its cDNA sequences (NM\_001098622). Sequences underlined: sgRNA targeting sequence. Sequences highlighted in blue: ending of first exon. (B) Sequencing of wildtype PSCs and PSCs clone #19, #23, and #24 with NANOS3 deletions. Please note, the NANOS3 deletion in #19 PSCs covers part of first exon, splicing donor site, and first intron, and in turn part of first intron is fused with first exon due to disrupted splicing. (C) Real-time RT-PCR analyses of relative *NANOS3* expression on wild-type H1 ESCs or ESCs with various *NANOS3* deletions at day 13 post differentiation. Data are shown as mean  $\pm$  one s.e.m. from 6 independent experiments. \*\*\*:  $p < 0.001$

**Figure S5. Establishing iPSC lines from NOA patients and normal controls.** (A) PCR detection of Y-Chr microdeletion with STS in derived iPSC lines and control hESCs (H1). (B) Predicted copy numbers of genes at AZFc region in two NOA-iPSC lines. (C) Real-time PCR analyses of copy numbers of genes at AZFc region in control H1 ESCs and established iPSC lines. Data are shown as mean  $\pm$  one s.e.m. from 3 independent experiments. (D) Origin of established iPSC lines examined by STR with PCR, compared to H1 and H9 ESCs used in the lab and their parental fibroblasts (Fib). (E) Representative karyotyping images from iPSC lines derived from NOA patients, P34 normal control, and H1 ESCs.

**Figure S6. Characterization of iPSC lines from NOA patients and controls.** (A) Immunofluorescence of pluripotency factors (including OCT4, NANOG, TRA-1-60 and TRA-1-81) on established iPSC lines. Scale bar: 100  $\mu$ m. (B) Real-time RT-PCR analyses of pluripotency-related genes on NOA-iPSCs, compared to control H1 ESCs and their parental fibroblasts. Data

are represented as mean  $\pm$  one s.e.m. from three independent experiments. (C) Images of embryoid bodies from differentiated iPSC lines and control H1 ESCs. Scale bar: 200  $\mu$ m.

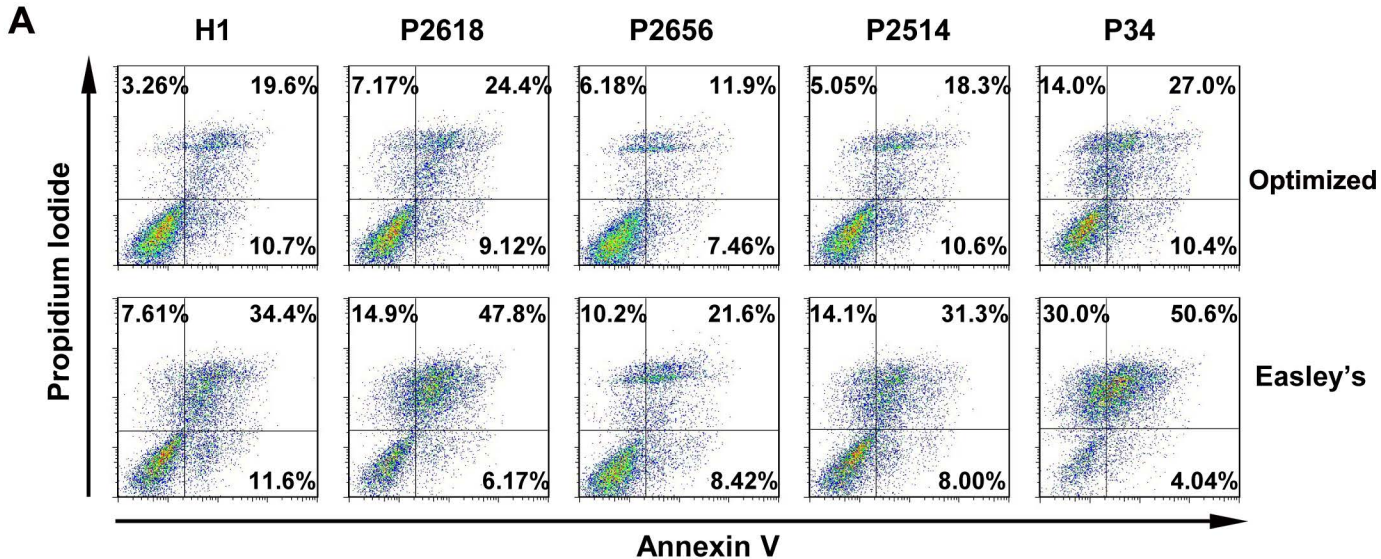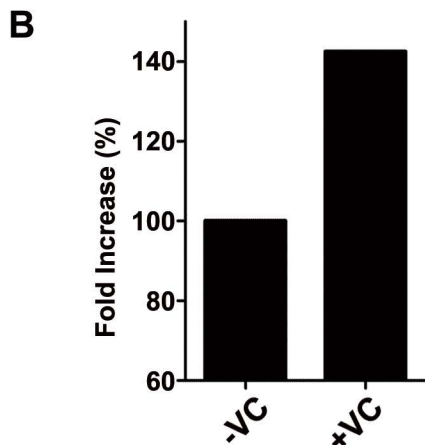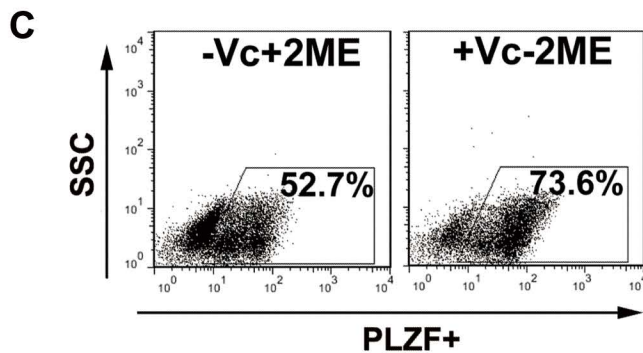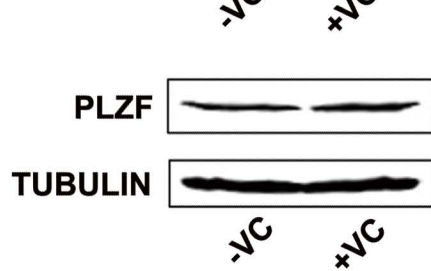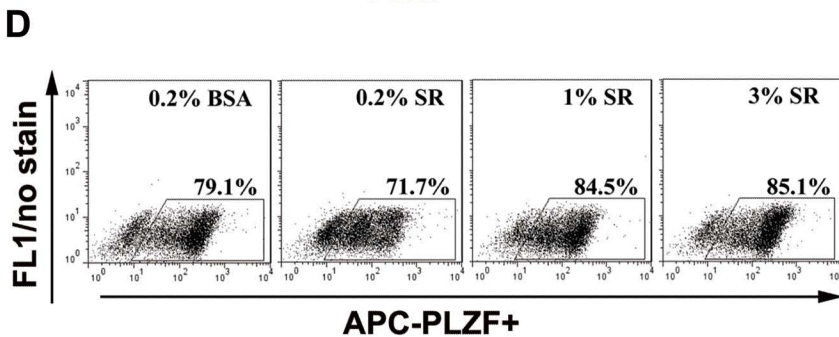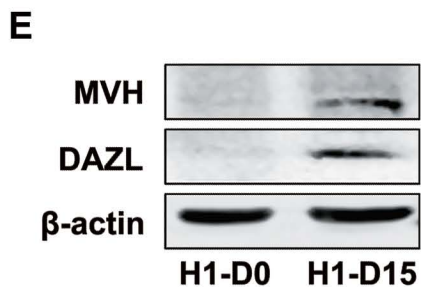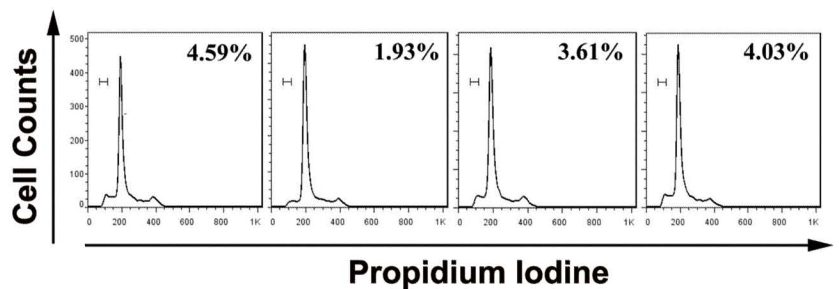



**A**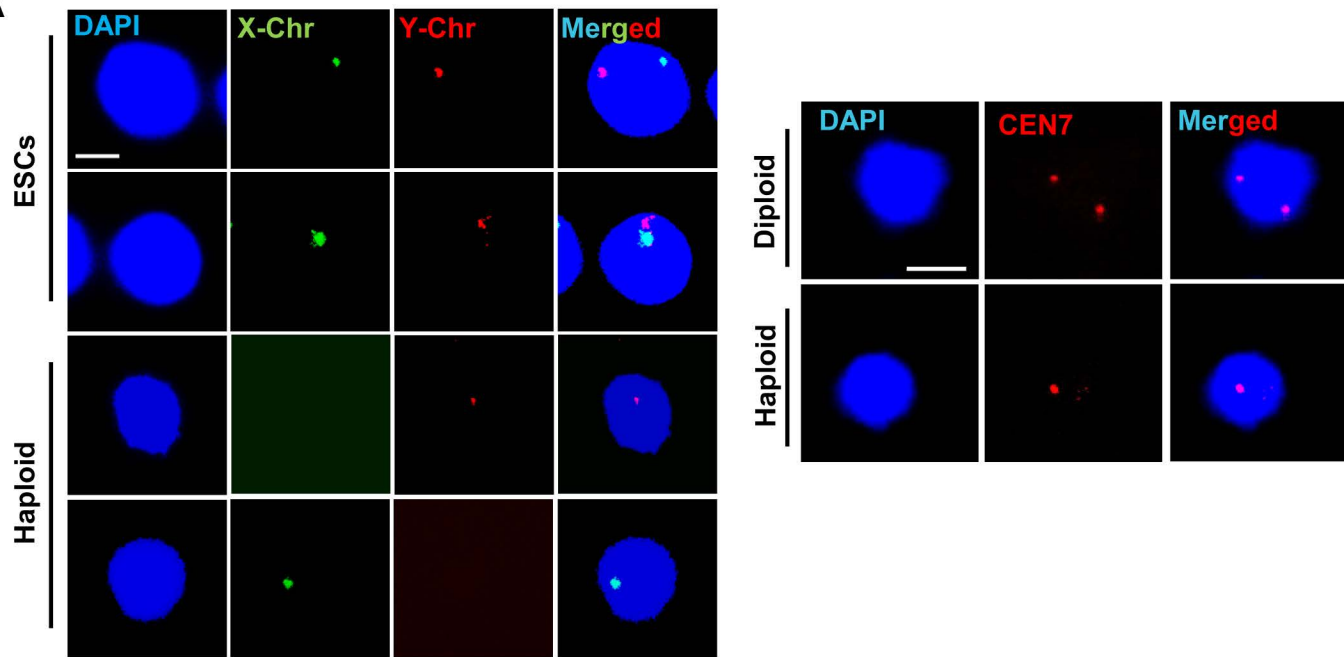**B**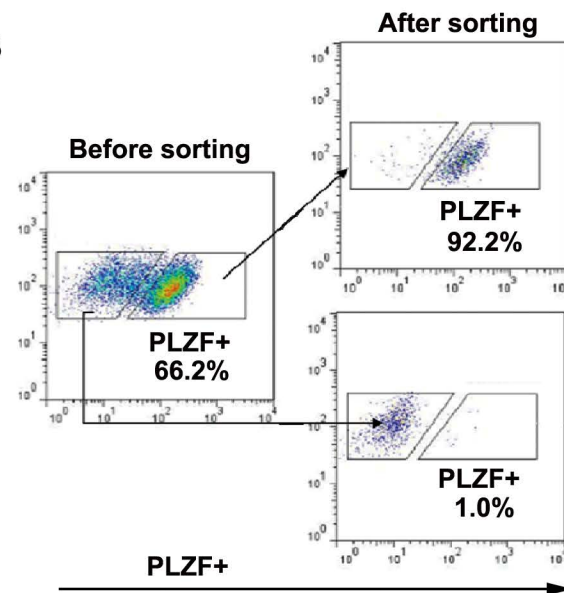

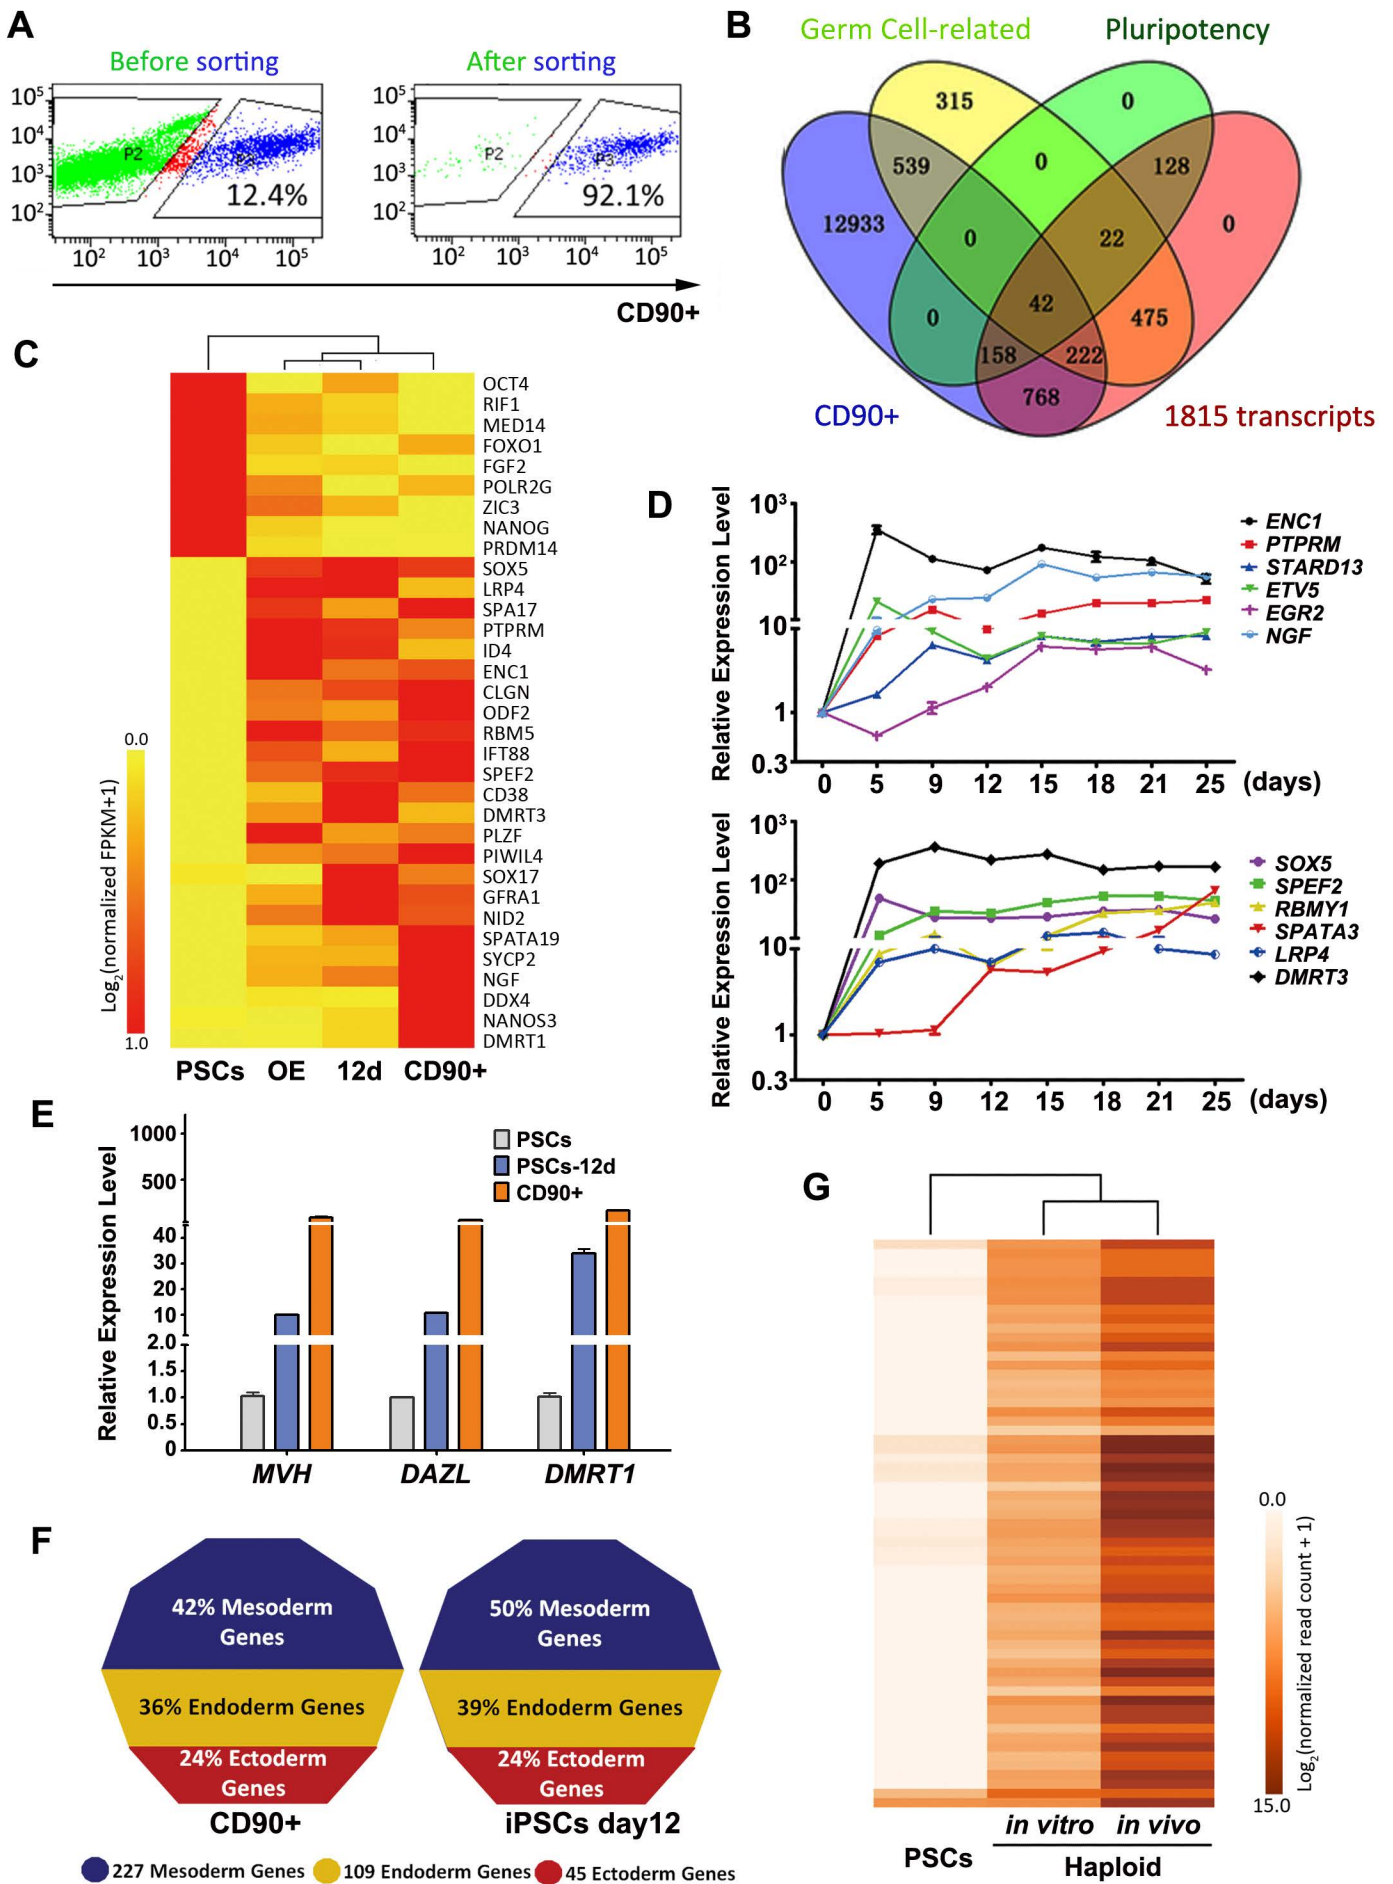

**A**

235-TTCTGCAAACACAACGGCGAGTCCCGGGCCATCTACCAGTCCCACGTGCTGAA  
#23: deletion of 125bp

GGACGAGGCTGGCAGGGTGTGTGCCATCCTGCGGGACTACGTGTGTCCC**CAGT**  
 GCGGCGCCACACGTGAGCGCGCCACACCCGACGCTTCTGCCACTTACTGGCCAG  
#24: deletion of 48bp

GGCTACACCTCCGTCTACAGCCA**CACC**CCCGAAACTCGGCAGGCAAG**AAGCTGGT**  
#19: deletion of 162bp

**CCGGCCTGACA**AGGCGAAGACACAGGACACAGGCCACCGCCGAGGAGGAG**GGAG**  
**GAGGAGCAG**GTTTCAGAGGTGCCGGGAAGTCTGAGCCTTCGCCCTCCTGCTCTCCC  
 TCCATGTCCACCTAGGAGGCTGCCTACACCTGGGCAAGGGCACCCGGGCTCGGCTG  
 GATTCCAGGAAGACCCACCCTATGACGAC

**B**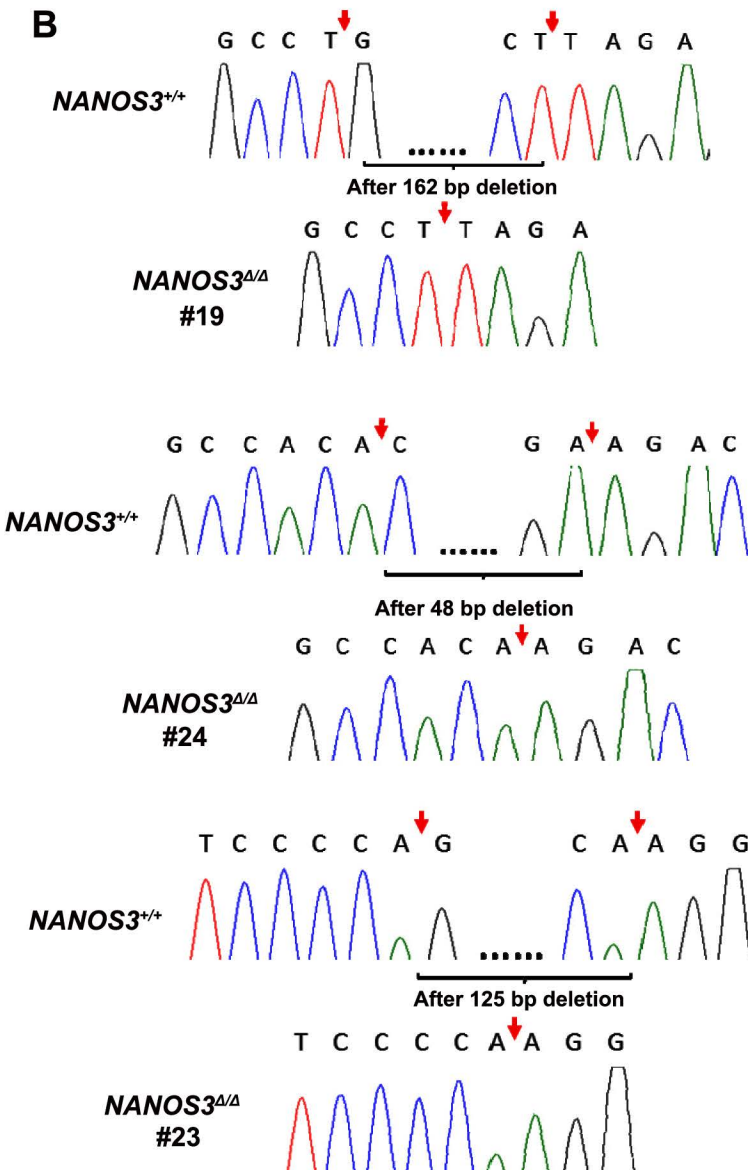**C**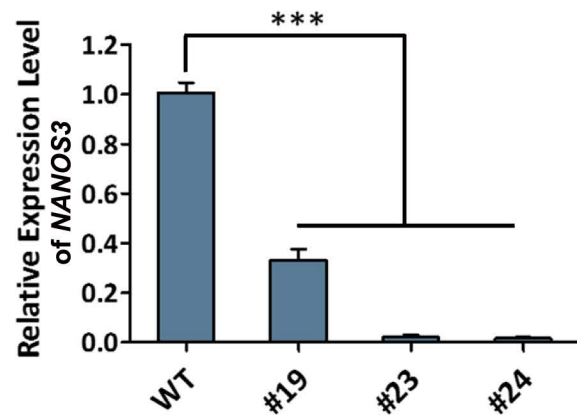

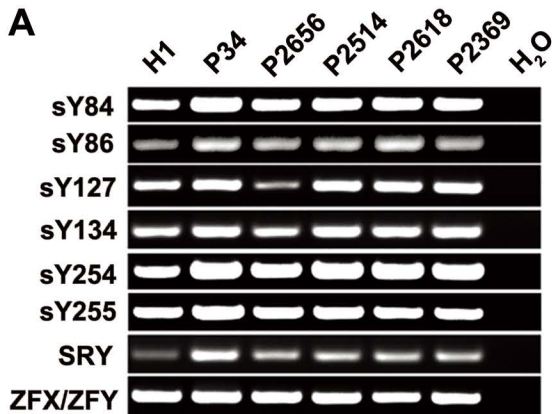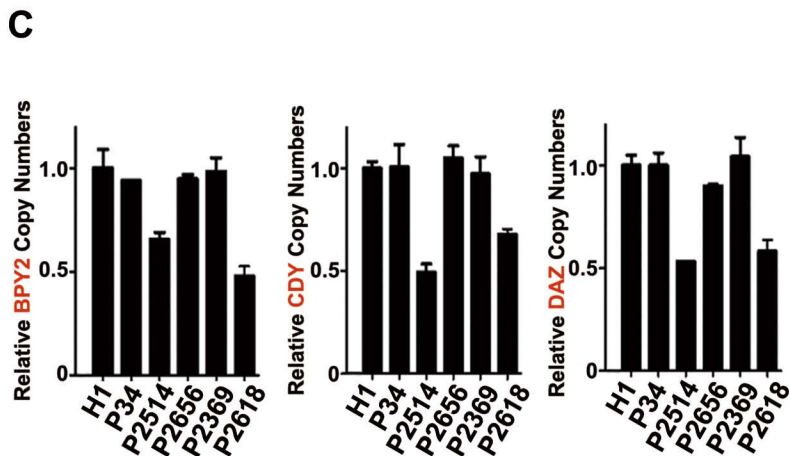

**B**

Gene copy numbers in P2514 and P2618 with micro-deletions at AZFc

| Genes | Size    | copy # | Number of copies present |                          |
|-------|---------|--------|--------------------------|--------------------------|
|       |         |        | P2618 (SY1191-, SY1291+) | P2514 (SY1191+, SY1291-) |
|       |         |        | b2/b3 deletion           | gr/gr deletion           |
| BPY2  | 321 bp  | 3      | 1                        | 2                        |
| CDY   | 1670 bp | 2      | 1                        | 1                        |
| PRY   | 444 bp  | 2      | 2                        | 2                        |
| DAZ   | 2230 bp | 4      | 2                        | 2                        |
| RBMY  | 1900 bp | 6      | 6                        | 6                        |

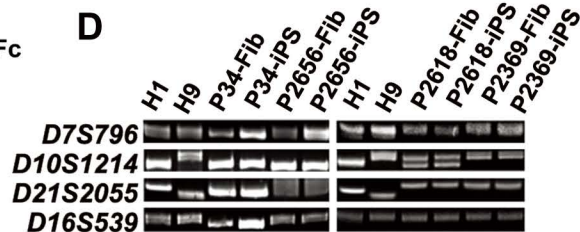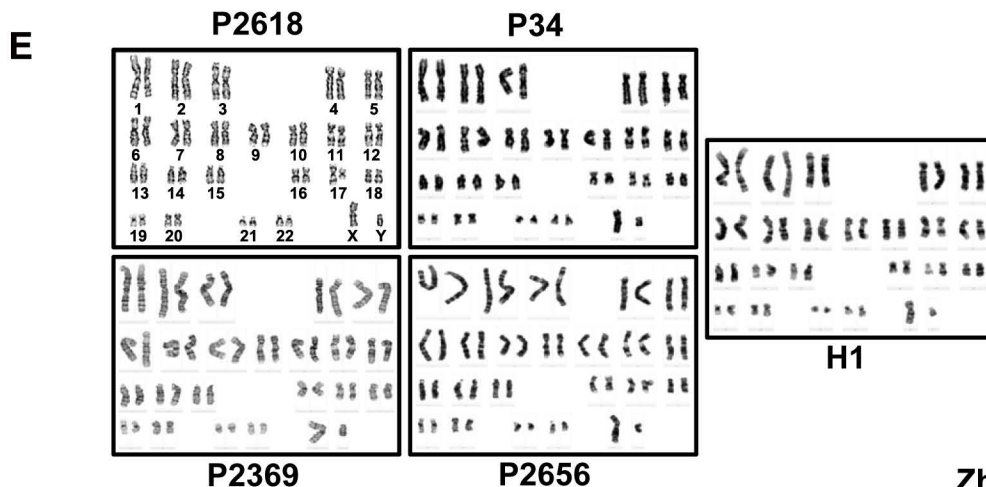

**A**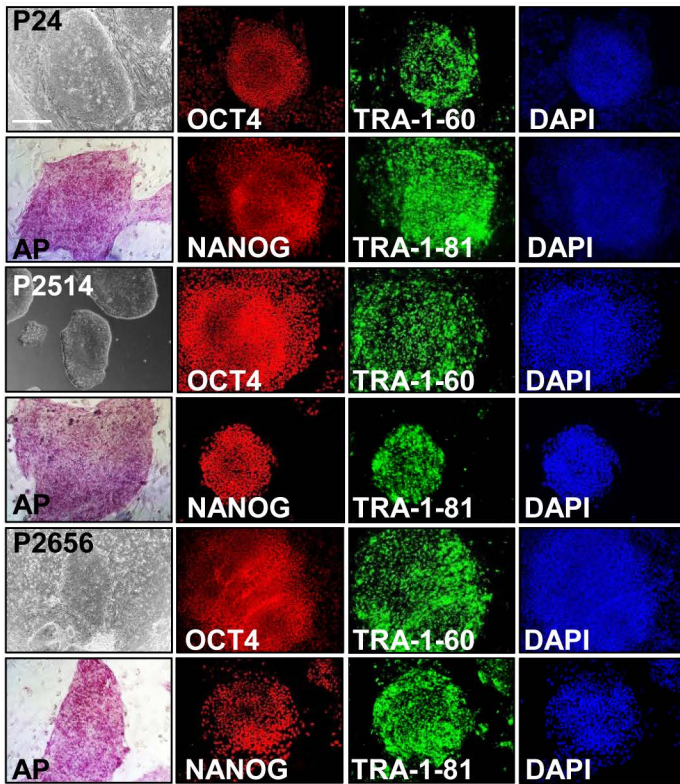**B**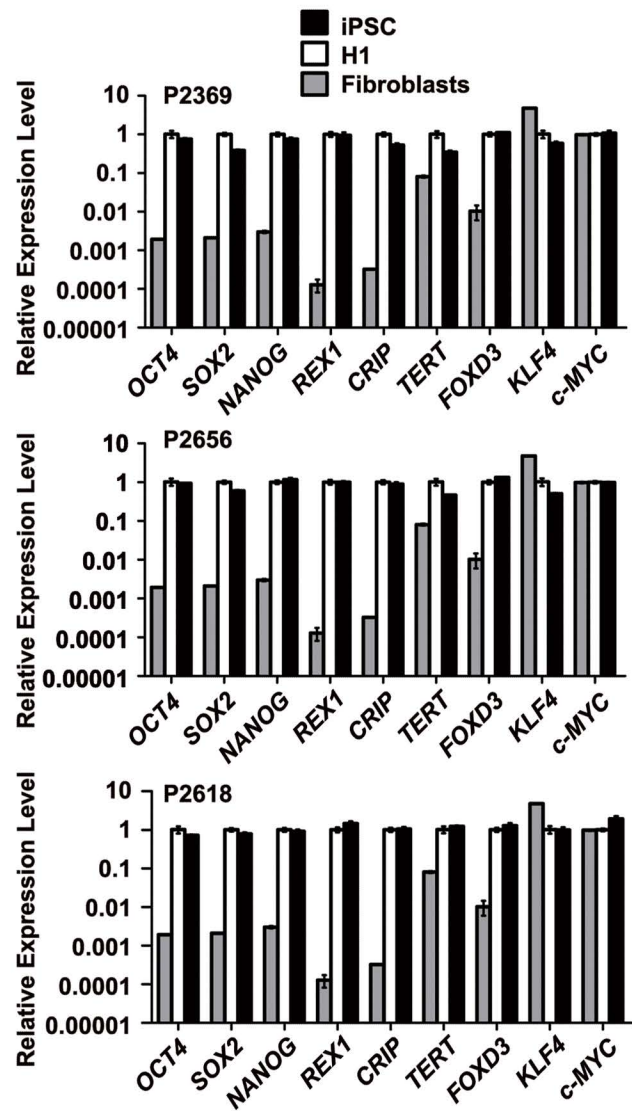**C**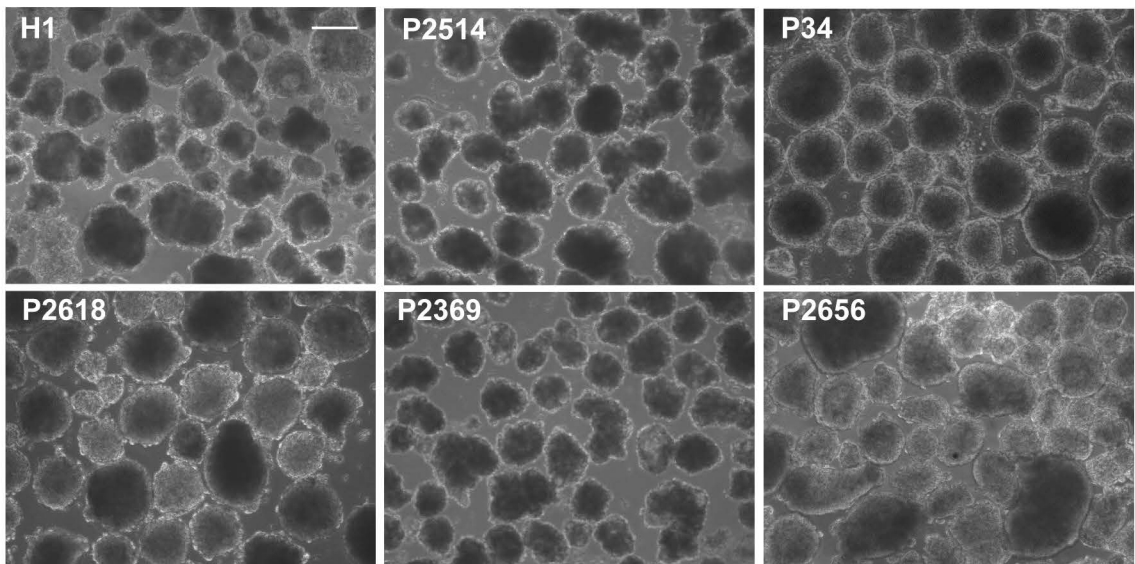

| <b>Primers used for PCR analyses</b> |                           |
|--------------------------------------|---------------------------|
| <b>Name</b>                          | <b>sequence (5'-3')</b>   |
| hMVH-F                               | TCAGACTTTTGAAGAAGCTAATCTC |
| hMVH-R                               | CAAGCCATCAAATCTCGTCC      |
| hDAZL-F                              | GCCCACAACCACGATGAATC      |
| hDAZI-R                              | CGGAGGTACAACATAGCTCCTTT   |
| hDKKL1-F                             | CTCTACCCTGGTGATCCCCTC     |
| hDKKL1-R                             | CGAAGCAGGTTACCTTTCAGGA    |
| hENC1-F                              | GCTGCTGTCTGATGCACAC       |
| hENC1-R                              | AGAGTTGCACTACCATGTCCT     |
| hPTPRM-F                             | TCCAGCAAGAGTAATTCTCCTCC   |
| hPTPRM-R                             | CATGTACGTGTTGGGTCTCCA     |
| hRBM1-F                              | CCATCACAGAGAGCGATATTCG    |
| hRBM1-R                              | CGGCTTACACCTGTTTTCTC      |
| hSPATA3-F                            | GCAGCCTAGCCCTGAATCC       |
| hSPATA3-R                            | CCTTCACGTTAGCATCTGGAG     |
| hSTARD13-F                           | CGAGGAGACAGAAATGGGTCA     |
| hSTARD13-R                           | TCCACTGCTTTCGCTGTGAAT     |
| human Stra8-F                        | ACTCTCAGTCTGATCTCATAGCC   |
| human Stra8-R                        | TACCAAGGGGAGGAACCATTC     |
| hTDRD9-F                             | AAAGGTTGCAGGTCTATCCACT    |
| hTDRD9-R                             | CAACTCAATCGCAGACTCTGAT    |
| hBLIMP1-F                            | TAAAGCAACCGAGCACTGAGA     |
| hBLIMP1-R                            | ACGGTAGAGGTCCTTTCCTTTG    |
| hCXCR4-F                             | CTTCTGGGCAGTTGATGCCGT     |
| hCXCR4-R                             | CTGTTGGTGGCGTGGACGAT      |
| hNANOS3-F                            | AAGGCGAAGACACAGGACAC      |
| hNANOS3-R                            | CGAAGGCTCAGACTTCCCG       |
| hPLZF-F                              | GAGATCCTCTTCCACCGCAAT     |
| hPLZF-R                              | CCGCATACAGCAGGTCATC       |
| hGFR $\alpha$ 1-F                    | CCAAGCACAGCTACGGAATG      |
| hGFR $\alpha$ 1-R                    | CAGGCACGATGGTCTGTCTG      |
| hTKTL1-F                             | TGGACAATCTTGTGGCAATCTT    |
| hTKTL1-R                             | CAGCGCCTCTGATAGATGTTTAT   |
| hDMRT3-F                             | ATGTGGCAAAGAGTAAGGGCT     |
| hDMRT3-R                             | GCGGTCTGTTGGCTTTCAAG      |
| hSYCP3-F                             | TTTGTTCAGCAGTGGGATT       |
| hSYCP3-R                             | TTCCGAACACTTGCTATCTC      |
| hTNP1-F                              | GACCAGCCGCAAATTAAGAGT     |
| hTNP1-R                              | GGTTGCCCTTACGGTATTTTCT    |
| hSPA17-F                             | AGAGAGCAACCGGACAATATACC   |
| hSPA17-R                             | CTGCTGGATCAAAGTTGGTTTTTC  |
| hNGF-F                               | GGCAGACCCGCAACATACT       |
| hNGF-R                               | CACCACCGACCTCGAAGTC       |
| hLRP4-F                              | GTGAGGAGGACGAGTTTCCCT     |
| hLRP4-R                              | TCACCGTCGCAGTACCAATG      |
| hNID2-F                              | CCGGTGCTGTCGTCGTTAC       |
| hNID2-R                              | GGCTTCGTAGAAGTGCAGGG      |

|              |                          |
|--------------|--------------------------|
| hODF2-F      | GCACAGCTTCGGTCCAAAGA     |
| hODF2-R      | TCTGCCTTATGCTGATTCCCG    |
| hCLGN-F      | GTTCTCCTATCAAACCTCCCA    |
| hCLGN-R      | TCCGTGTCTTCATTCCAGTCAT   |
| hIFT88-F     | TCCTGAAACTTCACGCAATCC    |
| hIFT88-R     | GACCACCTGCATTAGCCATTC    |
| hSTK31-F     | GTATGGCAGTGTGGATATAGGGG  |
| hSTK31-R     | CCTGCTGAAGGTTGACTGGT     |
| hSOX5-F      | GAACAACAGGTGCTTGATGGG    |
| hSOX5-R      | GCCCTCGGGATTCCCTATAAAT   |
| hSOX9-F      | AGCGAACGCACATCAAGAC      |
| hSOX9-R      | CTGTAGGCGATCTGTTGGGG     |
| hACROSIN-F   | TTCGTGTGGGCGCTTCATT      |
| hACROSIN-R   | AGTCCAGGTCGATGAGATCCA    |
| hPRM1-F      | AGAGCCGGAGCAGATATTACC    |
| hPRM1-R      | TCTACATCGCGGTCTGTACCT    |
| hSPATA19-F   | CCCTTCCTACCAATAACCAGTTC  |
| hSPATA19-R   | ACATCTTCTCCCTTACACCCTG   |
| hSPEF2-F     | CTTGGAGCCAACACTTAACCTT   |
| hSPEF2-R     | GACGTTGCATGGTTTGCATCT    |
| hACRBP-F     | GAAAACCACGGCTTAGTGCC     |
| hACRBP-R     | GCAACGGTAGTGAGTGAAGT     |
| hPGK2-F      | TTGACGAGAACGCTCAGGTTG    |
| hPGK2-R      | ACGGCCCATTCCAACAATTAG    |
| hSOX17-F     | GTGGACCGCACGGAATTTG      |
| hSOX17-R     | GGAGATTCACACCGGAGTCA     |
| hNESTIN-F    | CTGCTACCCTTGAGACACCTG    |
| hNESTIN-R    | GGGCTCTGATCTCTGCATCTAC   |
| hT-F         | CTGGGTACTCCCAATGGGG      |
| hT-R         | GGTTGGAGAATTGTTCCGATGA   |
| hAFP-F       | AGACTGAAAACCCTCTTGAATGC  |
| hAFP-R       | GTCCTCACTGAGTTGGCAACA    |
| hCDX2-F      | GACGTGAGCATGTACCCTAGC    |
| hCDX2-R      | GCGTAGCCATTCCAGTCCT      |
| hGAPDH-RNA-F | ATTGCCCTCAACGACCACTTTG   |
| hGAPDH-RNA-R | TTGATGGTACATGACAAGGTGCGG |
| hPAX6-F      | TGGGCAGGTATTACGAGACTG    |
| hPAX6-R      | ACTCCCGCTTATACTGGGCTA    |
| hITGA6-F     | ATGCACGCGGATCGAGTTT      |
| hITGA6-R     | TTCCTGCTTCGTATTAACATGCT  |
| hSTX2-F      | TGAGAGTGGGAACCGGACTT     |
| hSTX2-R      | TTCTAGCTCGTCGTCTGTGGT    |
| hGATA6-F     | CTCAGTTCCTACGCTTCGCAT    |
| hGATA6-R     | GTCGAGGTCAGTGAACAGCA     |
| hTNRC6C-F    | CGTCCAAAGCCCTTCTAATCAG   |
| hTNRC6C-R    | TCTCCCATCTCCAATCATAGTGT  |
| hPAF1-F      | CCTGACACCTACCGCATCG      |
| hPAF1-R      | TGTA CTGTCTTTCGCATCCA    |

|                                                              |                              |
|--------------------------------------------------------------|------------------------------|
| hKIF16B-F                                                    | CTGGCTTAATACCTCGGATCTGT      |
| hKIF16B-R                                                    | GCTCACGGACTCTCAAATTGAAG      |
| hMEOX1-F                                                     | GGGGGTTCCAAGGAAATGGG         |
| hMEOX1-R                                                     | CGAGTCAGGTAGTTATGATGGGC      |
| hFOXF1-F                                                     | CCCAGCATGTGTGACCGAAA         |
| hFOXF1-R                                                     | ATCACGCAAGGCTTGATGTCT        |
| hBMP4-F                                                      | TGAGCCTTTCCAGCAAGTTT         |
| hBMP4-R                                                      | CTTCCCCGTCTCAGGTATCA         |
| hEGR2-F                                                      | GACACGGCACATCCGAATC          |
| hEGR2-R                                                      | GCACTGCTTTTCCGCTCTTT         |
| hETV5-F                                                      | CAGTCAACTTCAAGAGGCTTGG       |
| hETV5-R                                                      | TGCTCATGGCTACAAGACGAC        |
| hID4-F                                                       | TCCCGCCCAACAAGAAAGTC         |
| hID4-R                                                       | TGTCGCCCTGCTTGTTTAC          |
| hHAND1-F                                                     | GAGAGCATTAAACAGCGCATTCCG     |
| hHAND1-R                                                     | CGCAGAGTCTTGATCTTGGAGAG      |
|                                                              |                              |
| <b>Primers to amplify STS and coding genes at AZF region</b> |                              |
| <b>Name</b>                                                  | <b>sequence (5'-3')</b>      |
| hAZFA-SY84-F                                                 | AGAAGGGTCTGAAAGCAGGT         |
| hAZFA-SY84-R                                                 | GCCTACTACCTGGAGGCTTC         |
| hAZFA-SY86-F                                                 | GTGACACACAGACTATGCTTC        |
| hAZFA-SY86-R                                                 | ACACACAGAGGGACAACCCT         |
| hAZFB-SY127-F                                                | GGCTCACAAACGAAAAGAAA         |
| hAZFB-SY127-R                                                | CTGCAGGCAGTAATAAGGGA         |
| hAZFB-SY134-F                                                | GTCTGCCTCACCATAAAACG         |
| hAZFB-SY134-R                                                | ACCACTGCCAAAACCTTTCAA        |
| hAZFC-SY1191-F                                               | CCAGACGTTCTACCCTTTTCG        |
| hAZFC-SY1191-R                                               | GAGCCGAGATCCAGTTACCA         |
| hAZFC-SY1291-F                                               | TAAAAGGCAGAACTGCCAGG         |
| hAZFC-SY1291-R                                               | GGGAGAAAAGTTCTGCAACG         |
| hAZFC-SY254-F                                                | GGGTGTTACCAGAAGGCAAA         |
| hAZFC-SY254-R                                                | GAACCGTATCTACCAAAGCAGC       |
| hAZFC-SY255/DAZ-F                                            | GTTACAGGATTCGGCGTGAT         |
| hAZFC-SY255/DAZ-R                                            | CTCGTCATGTGCAGCCAC           |
| hZFX-F                                                       | ACCGCTGTACTIONGACTGTGATTACAC |
| hZFX-R                                                       | GCACCTCTTTGGTATCCGAGAAAGT    |
| hZFY-F                                                       | ACCACTGTACTIONGACTGTGATTACAC |
| hZFY-R                                                       | GCACTTCTTTGGTATCTGAGAAAGT    |
| hSRY-SY14-F                                                  | GAATATTCCCGCTCTCCGGA         |
| hSRY-SY14-R                                                  | GCTGGTGCTCCATTCTTGAG         |
| hBPY2-DNA-F                                                  | CCAGGACCATGTGATATGG          |
| hBPY2-DNA-R                                                  | CTAATTCCCTCTTTACGCATGACC     |
| hCDY-DNA-F                                                   | GCTGCCAGCAAGAACGTTAG         |
| hCDY-DNA-R                                                   | TTTGTGGTCAAAGGGGCTGT         |
| hGAPDH-DNA-F                                                 | GGGAAGCTCAAGGGAGATAAAATTC    |
| hGAPDH-DNA-R                                                 | GTAGTTGAGGTCAATGAAGGGGTC     |
|                                                              |                              |



| <b>Primers for bisulfate-sequencing</b>                 |                                   |
|---------------------------------------------------------|-----------------------------------|
| <b>Name</b>                                             | <b>sequence (5'-3')</b>           |
| H19 DMR-F-1                                             | AGGTGTTTTAGTTTTATGGATGATGG        |
| H19 DMR-R-1                                             | TCCTATAAATATCCTATTCCCAAATAACC     |
| H19 DMR-F-2                                             | TGTATAGTATATGGGTATTTTTGGAGGTTT    |
| H19 DMR-R-2                                             | TCCTATAAATATCCTATTCCCAAATAACC     |
| PEG10 DMR -F                                            | GGTGTAATTTATATAAGGTTTATAGTTTG     |
| PEG10 DMR -R                                            | AACAAAAAAAAATAAAATCCCACAC         |
| SNRPN DMR-F-1                                           | GGTTTTTTTTTATTGTAATAGTGTTGTGGGG   |
| SNRPN DMR-R-1                                           | CTCCAAAACAAAAACTTTAAAACCCAAATTC   |
| SNRPN DMR-F-2                                           | CAATACTCCAAATCCTAAAACTTAAAATATC   |
| SNRPN DMR-R-2                                           | GGTTTTAGGGGTTTAGTAGTTTTTTTTTTTTGG |
|                                                         |                                   |
| <b>Primers to amplify STR</b>                           |                                   |
| <b>Name</b>                                             | <b>sequence (5'-3')</b>           |
| D7S796-F                                                | TTTTGGTATTGGCCATCCTA              |
| D7S796-R                                                | GAAAGGAACAGAGAGACAGGG             |
| D10S1214-F                                              | ATTGCCCCAAAACTTTTTTG              |
| D10S1214-R                                              | TTGAAGACCAGTCTGGGAAG              |
| D21S2055-F                                              | AACAGAACCAATAGGCTATCTATC          |
| D21S2055-R                                              | TACAGTAAATCACTTGGTAGGAGA          |
| D16S539-F                                               | GGGGGTCTAAGAGCTTGTA AAAAAG        |
| D16S539-R                                               | GTTTGTGTGTGCATCTGTAAGCATGTATC     |
|                                                         |                                   |
|                                                         |                                   |
| <b>Primers to amplify endogenous or exogenous genes</b> |                                   |
| <b>Name</b>                                             | <b>sequence (5'-3')</b>           |
| Exo-hOCT4-F                                             | CCAGTATCGAGAACCGAGTGAG            |
| Exo-hOCT4-R                                             | AAGACAGGGCCAGGTTTCC               |
| Exo-hSOX2-IRES-F                                        | GCAGATGCAGCCCATGCA                |
| Exo-hSOX2-IRES-R                                        | AAGACAGGGCCAGGTTTCC               |
| Exo-hKLF4-IRES-F                                        | GGCTGCGGCAAACCTA                  |
| Exo-hKLF4-IRES-R                                        | AAGACAGGGCCAGGTTTCC               |
| Exo-hC-MYC-IRES-F                                       | TGAACAGCTACGGA ACTCTTG TG         |
| Exo-hC-MYC-IRES-R                                       | CCAAAAGACGGCAATATGGTG             |
| hOCT4-F                                                 | CAAAGCAGAAACCTCGTGC               |
| hOCT4-R                                                 | TCTCACTCGGTTCTCGATACTG            |
| hSOX2-F                                                 | TACAGCATGTCCTACTCGCAG             |
| hSOX2-R                                                 | GAGGAAGAGGTAACCACAGGG             |
| hNANOG-F                                                | ATGAACATGCAACCTGAAGACG            |
| hNANOG-R                                                | GCTGATTAGGCTCCAACCATAC            |
| hREX1-F                                                 | AAAGCATCTCCTCATT CATGGT           |
| hREX1-R                                                 | TGGGCTTTCAGGTTATTTGACT            |
| hCRIPTO/TDGF1-F                                         | TACCTGGCCTTCAGAGATGACA            |
| hCRIPTO/TDGF1-R                                         | CCAGCATTTACACAGGGAACAC            |
| hTERT-F                                                 | AGCATTCTGCTCAAGCTGACT             |
| hTERT-R                                                 | ACTCACTCAGGCCTCAGACTCC            |
| hFOXD3-F                                                | AAGCCCAAGAACAGCCTAGTGA            |

|          |                        |
|----------|------------------------|
| hFOXD3-R | GGGTCCAGGGTCCAGTAGTTG  |
| hKLF4-F  | TGACCAGGCACTACCGTAAA   |
| hKLF4-R  | GACTCAGTTGGGAACTTGACC  |
| hMYC-F   | GGGCTTTATCTAACTCGCTGTA |
| hMYC-R   | GTCCTTGCTCGGGTGTTGTA   |

**Primers for sgRNA in NANOS3 knockout**

| Name      | Sequence (5'-3')                  |
|-----------|-----------------------------------|
| F (5'-3') | CGAAGCTGGTCCGGCCTGACAGTTTTAGAG    |
| R (5'-3') | CTAGCTCTAAAAGTGCAGGCCGGACCAGCTTCG |

**Primers for sequencing NANOS3 knockout locus**

| Name      | Sequence (5'-3')        |
|-----------|-------------------------|
| F (5'-3') | TTCTGCAAACACAACGGCGAG   |
| R (5'-3') | TCCAGCCTGAGCAACAGAAAGAG |
